# Supplementary material
Source: ML conference proceedings conference paper supplement (https://openaccess.thecvf.com/content/CVPR2026/html/Zeng_Label_What_Matters_CVPR_2026_paper.html)
Supplement: Supplementary file 1 [file Zeng_Label_What_Matters_CVPR_2026_supplemental.pdf]

# Label What Matters: Modality-Balanced and Difficulty-Aware Multimodal Active Learning (Supplementary Material)

Yuqiao Zeng<sup>1</sup>, Xu Wang<sup>1</sup>, Tengfei Liang<sup>1</sup>, Yiqing Hao<sup>1</sup>, Yi Jin<sup>1\*</sup>, Hui Yu<sup>2</sup>

<sup>1</sup>Key Laboratory of Big Data and Artificial Intelligence in Transportation, Ministry of Education;  
State Key Laboratory of Advanced Rail Autonomous Operation;

School of Computer and Information Technology, Beijing Jiaotong University, Beijing, China

<sup>2</sup>School of Psychology & Neuroscience, University of Glasgow, Glasgow, UK

{yuqiaozeng, xu.wang, tengfei.liang, yiqinghao, yjin}@bjtu.edu.cn

Hui.Yu@glasgow.ac.uk

## A. Theoretical Analysis

**Problem as an MDP.** Let  $\mathcal{L}_t$  and  $\mathcal{U}_t$  be the labeled and unlabeled sets at round  $t$ . Given a fixed backbone architecture and a fixed training/evaluation protocol with a fixed validation split, define the operators

$$\text{TRAIN}_E(\mathcal{L}) \quad \text{and} \quad \text{EVAL}(\cdot) \mapsto (g, \phi, \bar{u}, \bar{d}, \rho),$$

where  $E$  is the number of epochs,  $g$  collects validation metrics (Top-1, NLL, ECE),  $\phi \in \mathbb{R}^M$  are modality contributions (e.g., Top-1 gaps),  $(\bar{u}, \bar{d})$  summarize uncertainty/diversity, and  $\rho$  are training diagnostics. We instantiate the MDP by

$$s_t = [g_t \parallel \phi_t \parallel \bar{u}_t \parallel \bar{d}_t \parallel \rho_t], \quad a_t \subset \mathcal{U}_t, \quad |a_t|=b,$$

and the transition

$$s_{t+1} = T(s_t, a_t) := \text{EVAL}(\text{TRAIN}_E(\mathcal{L}_t \cup a_t)), \quad (1)$$

with  $\mathcal{L}_{t+1} = \mathcal{L}_t \cup a_t$  and  $\mathcal{U}_{t+1} = \mathcal{U}_t \setminus a_t$ . Because  $s_{t+1}$  is computed only from  $(s_t, a_t)$  via the fixed protocol (deterministic up to optimisation randomness), the process is Markov and the MDP is well-defined with finite horizon  $T$ .

**Reward and shaping.** Our per-round reward is

$$r_t = \text{Top-1}_t^{\text{RL-MBA}} - \frac{1}{|\mathcal{E}|} \sum_{h \in \mathcal{E}} \text{Top-1}_t^{(h)}, \quad (2)$$

where  $\mathcal{E}$  denotes a fixed set of strong baselines. The baseline scores are *precomputed offline* under the same protocol and treated as constants during RL-MBA training; thus the shaping term is action-independent at each

round. Therefore maximizing  $r_t$  is equivalent to maximizing  $\text{Top-1}_t^{\text{RL-MBA}}$  up to a constant offset:

$$r_t = \text{Top-1}_t^{\text{RL-MBA}} - c_t.$$

Let the discounted return be  $G_t = \sum_{k=0}^{T-t} \gamma^k r_{t+k}$ . The policy gradient estimator with an action-independent baseline  $b^{\text{bl}}$  is

$$\nabla_{\theta} J(\theta) = \mathbb{E} \left[ \sum_{t=1}^T (G_t - b^{\text{bl}}) \nabla_{\theta} \log \pi_{\theta}(a_t | s_t) \right]. \quad (3)$$

**Lemma 1 (Unbiasedness and policy invariance).** (i) Subtracting any action-independent baseline  $b^{\text{bl}}$  leaves  $\nabla_{\theta} J$  unbiased. (ii) Replacing the per-round reward by  $r'_t = r_t - c_t$  with  $c_t$  independent of  $a_t$  leaves the optimal policy unchanged. *Sketch.* (i)  $\mathbb{E}[b^{\text{bl}} \nabla \log \pi_{\theta}(a_t | s_t)] = b^{\text{bl}} \cdot 0$ . (ii) Adding constants per round only shifts  $G_t$  by an action-independent amount; the induced preference over actions is unchanged.

**Dynamic feedback emerges from the transition.** By (1), the next state packs *feedback* from the labels acquired at  $t$ : modality contributions  $\phi_{t+1}$ , calibration/uncertainty summaries  $\bar{u}_{t+1}$ , and training diagnostics  $\rho_{t+1}$  are all functions of  $a_t$  through retraining and reevaluation. Hence the policy optimizes *long-term* returns by trading off immediate gains and how the choice reshapes future states.

**A. Validity: Markov property and closed-loop coupling**

**Proposition 1 (Markovity).** Under a fixed training/evaluation protocol (optimizer, epochs  $E$ , and a fixed validation split), the process  $(s_t, a_t) \mapsto s_{t+1}$  defined in (1)

\*Corresponding author.

is Markov. *Proof sketch.* Given  $(\mathcal{L}_t, \mathcal{U}_t)$  encoded in  $s_t$  and  $a_t$ , the pair uniquely determines the training set  $\mathcal{L}_t \cup a_t$  and thus the trained weights and validation statistics (in expectation over optimisation randomness).

**Proposition 2 (Closed-loop AMCB/EFDA).** AMCB produces weights  $w_t = \text{softmax}(\Delta_t/\tau)$  from  $\phi_t$  (e.g., Top-1 gaps), and EFDA computes fused evidential uncertainty  $U_t(x)$  from  $\alpha_f$  parameterized by  $w_t$ . Both  $w_t$  and summary statistics  $(\bar{u}_t, \bar{d}_t)$  appear in  $s_t$  and affect scoring/selection; after retraining, they update to  $(w_{t+1}, \bar{u}_{t+1}, \bar{d}_{t+1})$  through  $T$ . Thus AMCB/EFDA are endogenously coupled to the policy via  $s_t$ , forming a closed loop.

## B. Safety: reward shaping and variance reduction

**Proposition 3 (Safe shaping).** Using (2) is equivalent to using absolute accuracy reward up to a per-round constant; hence the optimal policy is preserved. Together with Lemma 1(i), employing a moving-average baseline  $b^{\text{bl}}$  reduces estimator variance without bias.

## C. Adaptivity: policy-gradient alignment reduces imbalance

We quantify imbalance by a dispersion functional  $D(\phi)$ . For  $M=2$ ,  $D(\phi) = |\phi_1 - \phi_2|$ ; for  $M>2$ ,

$$D(\phi) = \frac{1}{M} \sum_{m=1}^M (\phi_m - \bar{\phi})^2, \quad \bar{\phi} = \frac{1}{M} \sum_{m=1}^M \phi_m. \quad (4)$$

We consider the standard smoothness setting for policy optimization.

**Assumption 1 (Smooth landscape).**  $J(\theta)$  is  $\beta$ -smooth and  $\|\nabla J(\theta)\| \leq G$  within the region visited by training.

**Assumption 2 (Alignment).** There exists  $\varepsilon > 0$  such that

$$\langle \nabla_{\theta} J(\theta), \nabla_{\theta} (-D(\phi(\theta))) \rangle \geq \varepsilon \quad (5)$$

along the training trajectory.

**Lemma 2 (Monotone decrease under small steps).** With step size  $\eta > 0$ ,

$$\begin{aligned} D(\phi(\theta + \eta \nabla J)) - D(\phi(\theta)) &\approx \eta \langle \nabla D, \nabla J \rangle + O(\eta^2) \\ &\leq -\eta \varepsilon + O(\eta^2). \end{aligned} \quad (6)$$

**Theorem 1 (Dynamic feedback adaptation).** Under Assumptions 1–2 and sufficiently small  $\eta$ , the policy-gradient update increases the expected return and reduces  $D(\phi)$  up to  $O(\eta^2)$ , thereby adapting modality emphasis across rounds through the closed-loop transition  $T$ .

## D. Why the reward supports long-horizon adaptivity

Let  $r_t = \Delta \text{Top-1}_t - c_t$  with  $c_t$  independent of  $a_t$ . Then

$$G_t = \sum_{k=0}^{T-t} \gamma^k \Delta \text{Top-1}_{t+k} - \sum_{k=0}^{T-t} \gamma^k c_{t+k}. \quad (7)$$

The second summation is action-independent, while the first accumulates future accuracy gains induced by current choices through  $T$ .

## E. Auxiliary regularization and alignment

To stabilise the alignment in (5), we use two auxiliary losses:

$$\mathcal{L}_{\text{modality}} = \frac{1}{M} \sum_{m=1}^M (\phi_{t,m} - \bar{\phi}_t)^2, \quad (8)$$

$$\mathcal{L}_{\text{difficulty}} = \frac{1}{|a_t|} \sum_{x \in a_t} [\tau_u^t - U(x)]_+, \quad (9)$$

where  $\tau_u^t$  is the  $q$ -quantile of fused evidential uncertainty within round  $t$  and  $[z]_+ = \max(0, z)$ .

## F. Modality contributions in practice

In the main paper we use two types of modality contribution signals: (i) *Top-1 gaps*  $\Delta_m$  between modality- $m$  heads and the multimodal head, which directly drive AMCB; and (ii) *Shapley-style* contributions  $\phi_m$  used only for analysis/visualisation. Shapley-style scores are computed by Monte Carlo sampling over modality coalitions on the validation split and are never used during training.

## B. Additional Experimental Details

We follow the same datasets, backbones, optimisers, and active-learning protocol as in the main paper (Sec. 4). This supplementary provides implementation details omitted due to space.

**State construction.** The policy state  $s_t$  concatenates: (i) validation statistics  $g_t$  (Top-1, NLL, ECE), each normalised to  $[0, 1]$ ; (ii) modality contributions  $\phi_t$  (Top-1 gaps or their normalised variants); (iii) round-wise averages of fused uncertainty and diversity  $(\bar{u}_t, \bar{d}_t)$ ; and (iv) training diagnostics  $\rho_t$  such as moving averages of training loss and gradient norm. All features are standardised across rounds using running means and variances.

**Evidential heads and EFDA in practice.** Each modality-specific head outputs non-negative evidence  $e_m(x) \in \mathbb{R}_{\geq 0}^C$  via a `softplus` transformation. Dirichlet parameters are constructed as  $\alpha_m(x) = e_m(x) + 1$ . Before fusion, we apply temperature scaling on a held-out validation split (one scalar per modality) to improve calibration, and use the calibrated evidences in EFDA to compute fused uncertainty scores  $U(x)$ .

**Policy network and optimisation.** The policy is a lightweight two-layer MLP with ReLU activations. We train it with REINFORCE using discount  $\gamma=0.9$  and a moving-average baseline (smoothing coefficient 0.1). The

policy optimiser is AdamW with weight decay  $10^{-4}$  and global gradient clipping. Unless otherwise stated, we use  $\alpha=0.1$ ,  $\lambda_1=0.5$ , and  $\lambda_2=0.5$  in the total loss.

## References

- [1] Jordan T Ash, Chicheng Zhang, Akshay Krishnamurthy, John Langford, and Alekh Agarwal. Deep batch active learning by diverse, uncertain gradient lower bounds. *arXiv preprint arXiv:1906.03671*, 2019.
- [2] Razvan Caramalau, Binod Bhattarai, and Tae-Kyun Kim. Sequential graph convolutional network for active learning. In *Proceedings of the IEEE/CVF conference on computer vision and pattern recognition*, pages 9583–9592, 2021.
- [3] Melanie Ducoffe and Frederic Precioso. Adversarial active learning for deep networks: a margin based approach. *arXiv preprint arXiv:1802.09841*, 2018.
- [4] Yarin Gal, Riashat Islam, and Zoubin Ghahramani. Deep bayesian active learning with image data. In *International conference on machine learning*, pages 1183–1192. PMLR, 2017.
- [5] Ozan Sener and Silvio Savarese. Active learning for convolutional neural networks: A core-set approach. *arXiv preprint arXiv:1708.00489*, 2017.
- [6] Burr Settles. From theories to queries: Active learning in practice. In *Active learning and experimental design workshop in conjunction with AISTATS 2010*, pages 1–18. JMLR Workshop and Conference Proceedings, 2011.
- [7] Meng Shen, Yizheng Huang, Jianxiong Yin, Heqing Zou, Deepu Rajan, and Simon See. Towards balanced active learning for multimodal classification. In *Proceedings of the 31st ACM International Conference on Multimedia*, pages 3434–3445, 2023.
